# Supplementary material for: Identification and characterization of the antiplasmodial activity of Hsp90 inhibitors
Source: PubMed Central journal article supplement (PMC5518105; doi:10.1186/s12936-017-1940-7), 2017-07-19
Supplement: 12936_2017_1940_MOESM1_ESM.pdf [file 12936_2017_1940_MOESM1_ESM.pdf]

# **SUPPLEMENTARY INFORMATION**

Identification and characterization of the antiplasmodial activity of Hsp90 inhibitors

Claribel Murillo-Solano, Chunmin Dong, Cecilia G. Sanchez and Juan C. Pizarro

# Figure S1

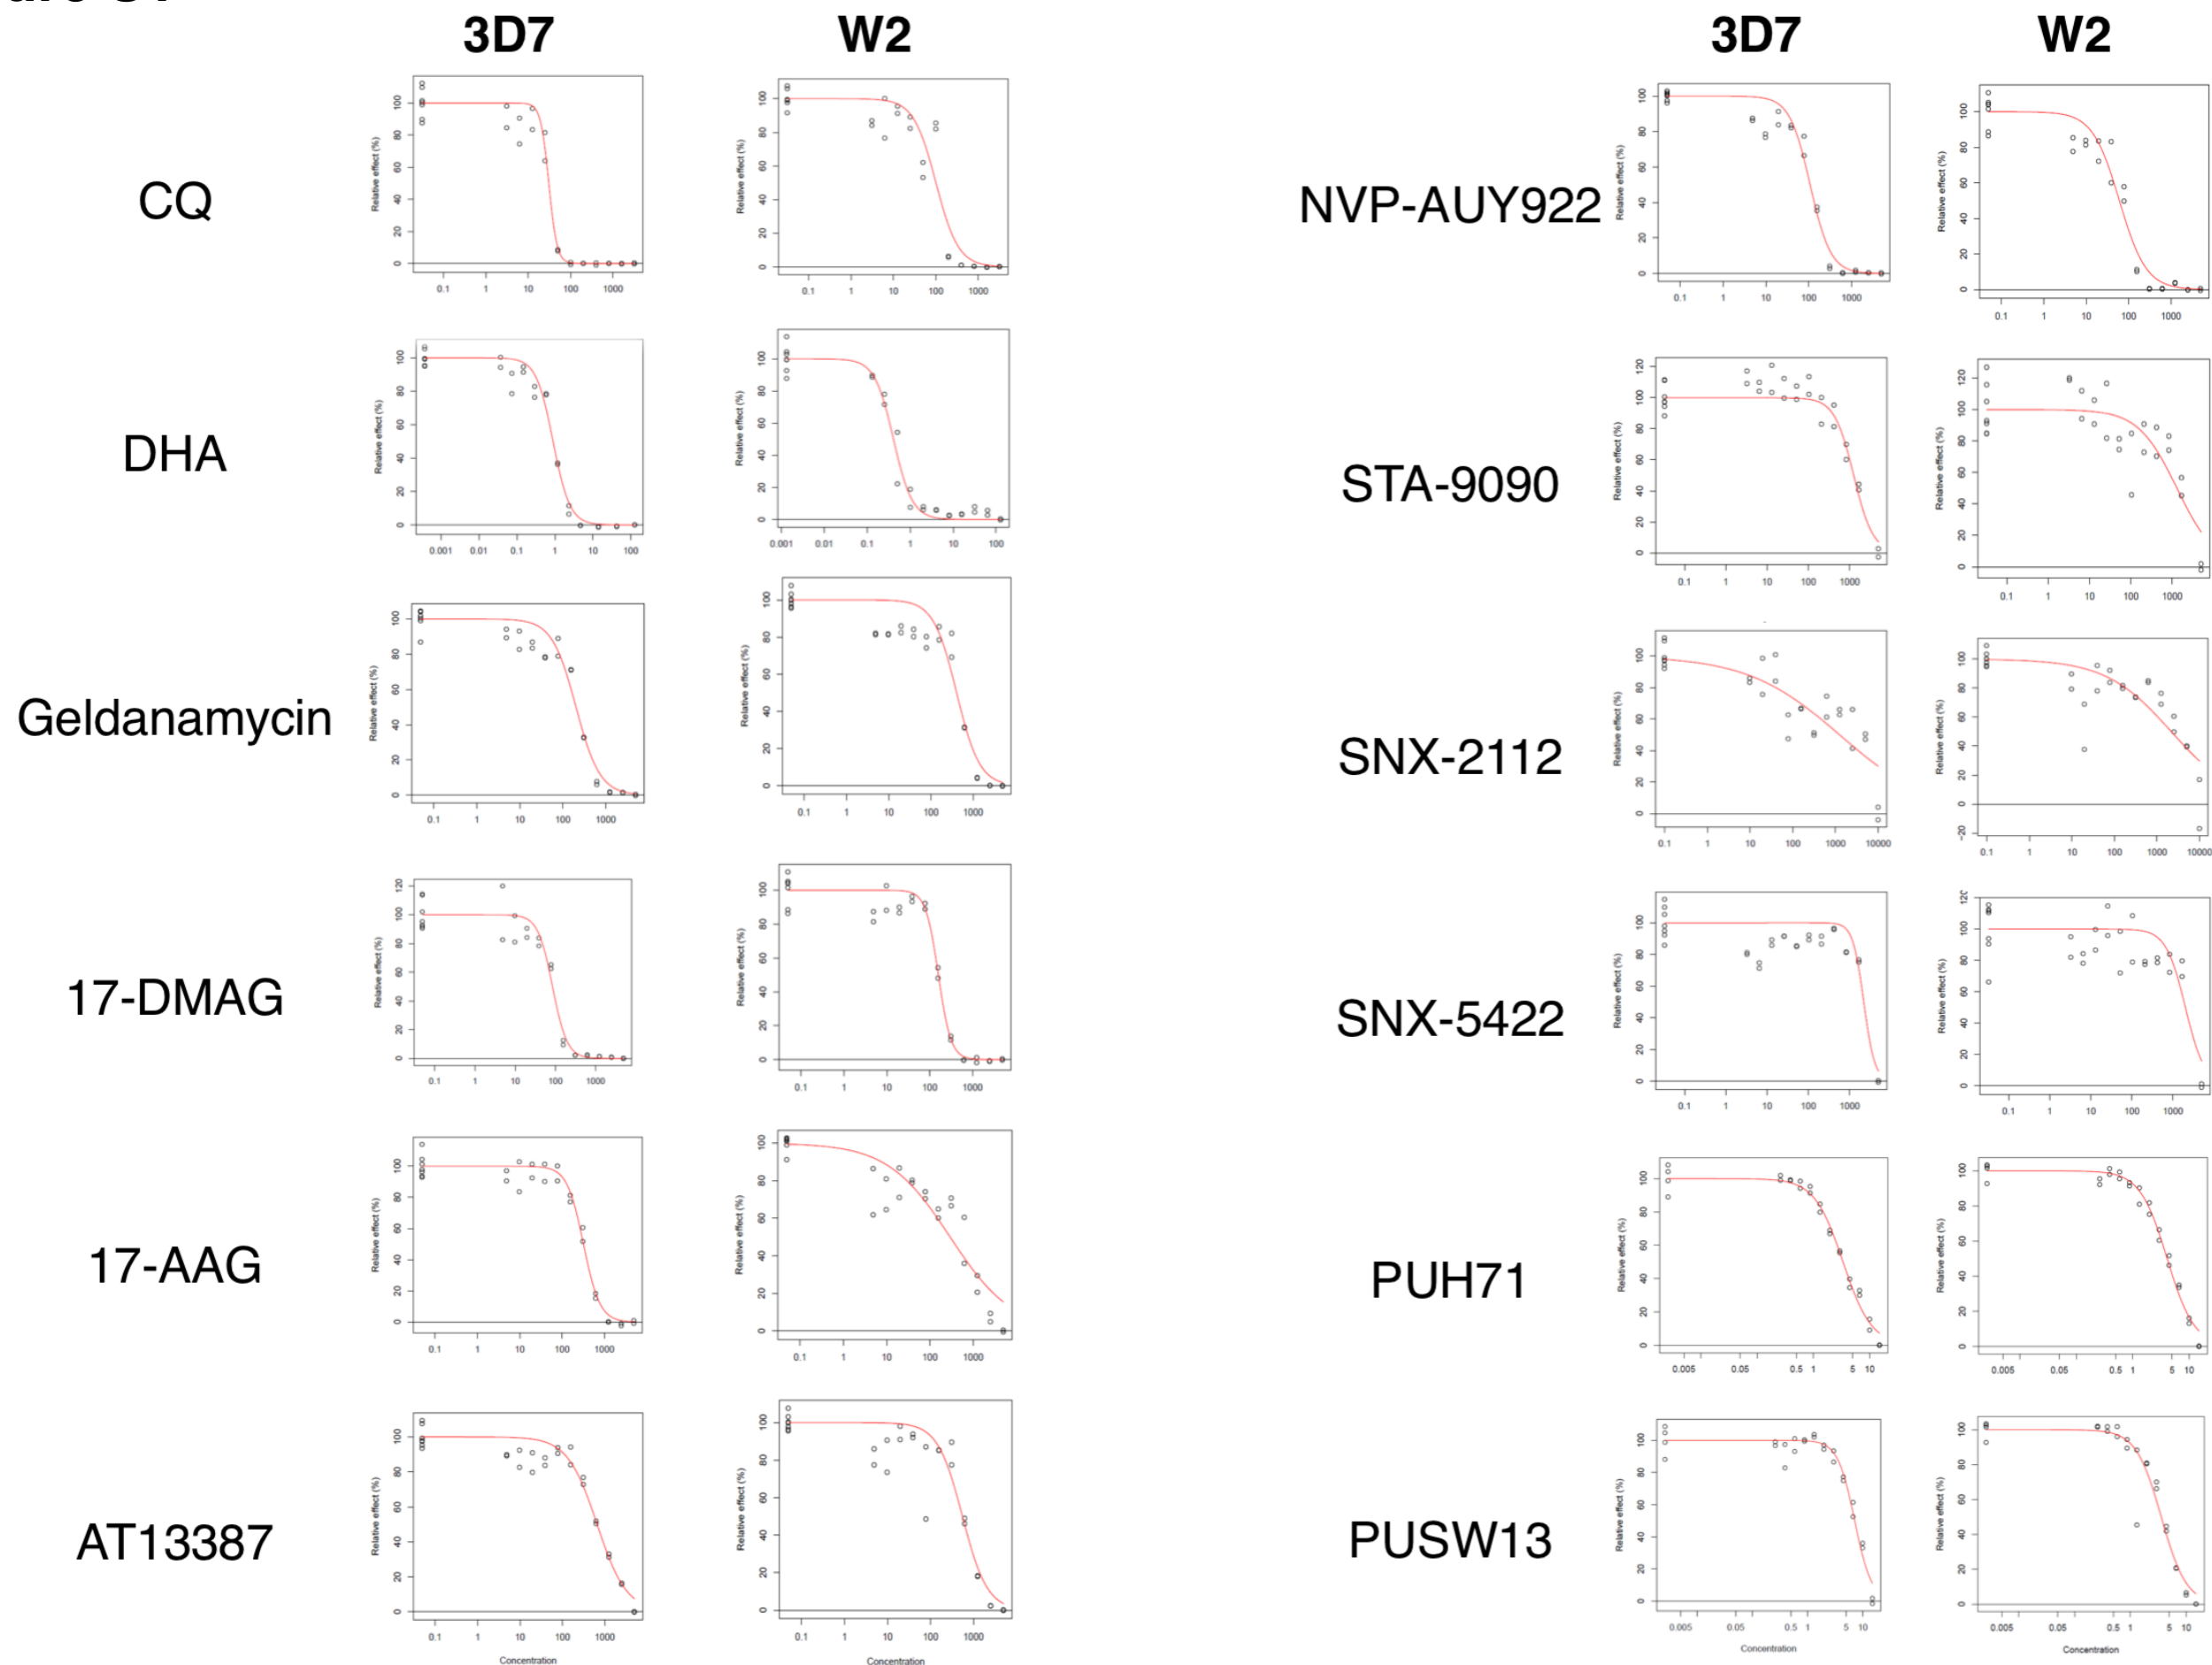

Figure S1. Dose response curves of different Hsp90 inhibitors against *P. falciparum* 3D7 and W2.

Figure S2

|          |           |           |           |           |           |           |            |
|----------|-----------|-----------|-----------|-----------|-----------|-----------|------------|
| 105<br>0 | 105<br>15 | 105<br>30 | 105<br>45 | 105<br>60 | 105<br>75 | 105<br>90 | 105<br>105 |
| 90<br>0  | 90<br>15  | 90<br>30  | 90<br>45  | 90<br>60  | 90<br>75  | 90<br>90  | 90<br>105  |
| 75<br>0  | 75<br>15  | 75<br>30  | 75<br>45  | 75<br>60  | 75<br>75  | 75<br>90  | 75<br>105  |
| 60<br>0  | 60<br>15  | 60<br>30  | 60<br>45  | 60<br>60  | 60<br>75  | 60<br>90  | 60<br>105  |
| 45<br>0  | 45<br>15  | 45<br>30  | 45<br>45  | 45<br>60  | 45<br>75  | 45<br>90  | 45<br>105  |
| 30<br>0  | 30<br>15  | 30<br>30  | 30<br>45  | 30<br>60  | 30<br>75  | 30<br>90  | 30<br>105  |
| 15<br>0  | 15<br>15  | 15<br>30  | 15<br>45  | 15<br>60  | 15<br>75  | 15<br>90  | 15<br>105  |
| 0<br>0   | 0<br>15   | 0<br>30   | 0<br>45   | 0<br>60   | 0<br>75   | 0<br>90   | 0<br>105   |

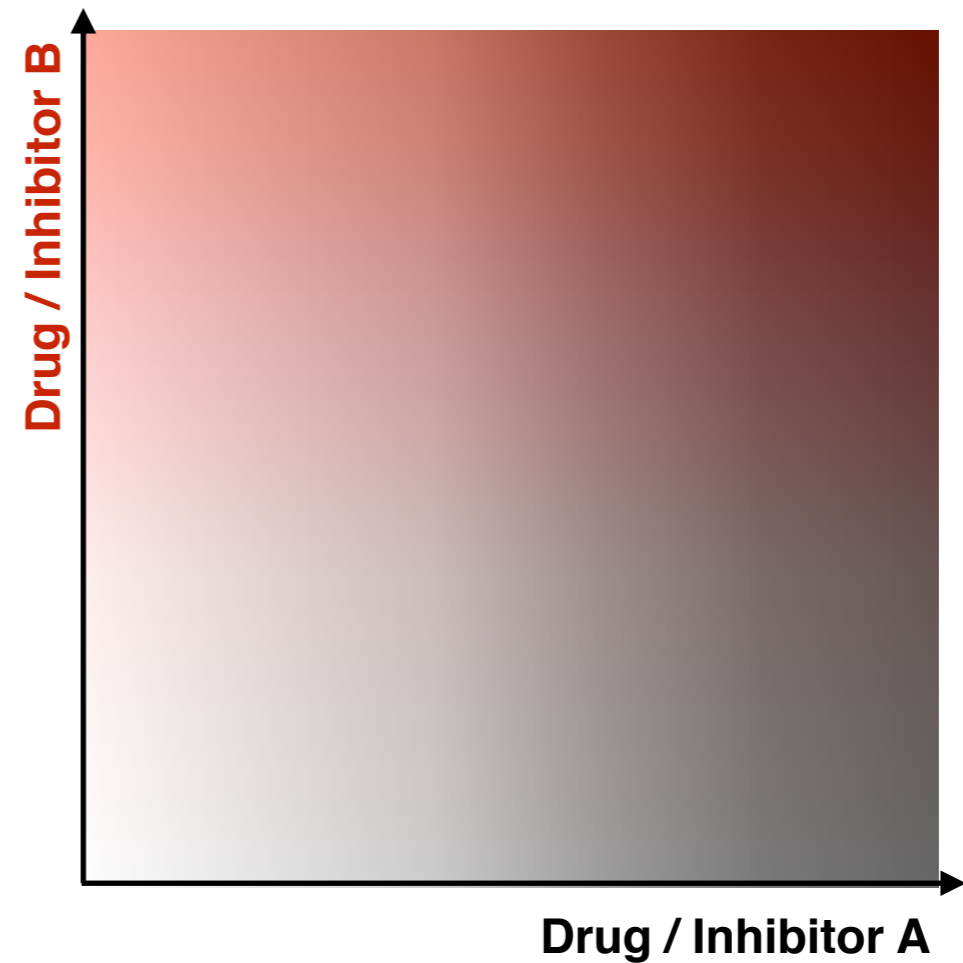

Figure S2. Plate configuration for the Hsp90 inhibitor / antimalarial drug interaction assays. The concentrations on the left are expressed as a percentage of the  $IC_{50}$  of the compound or antimalarial drug.

# Figure S3

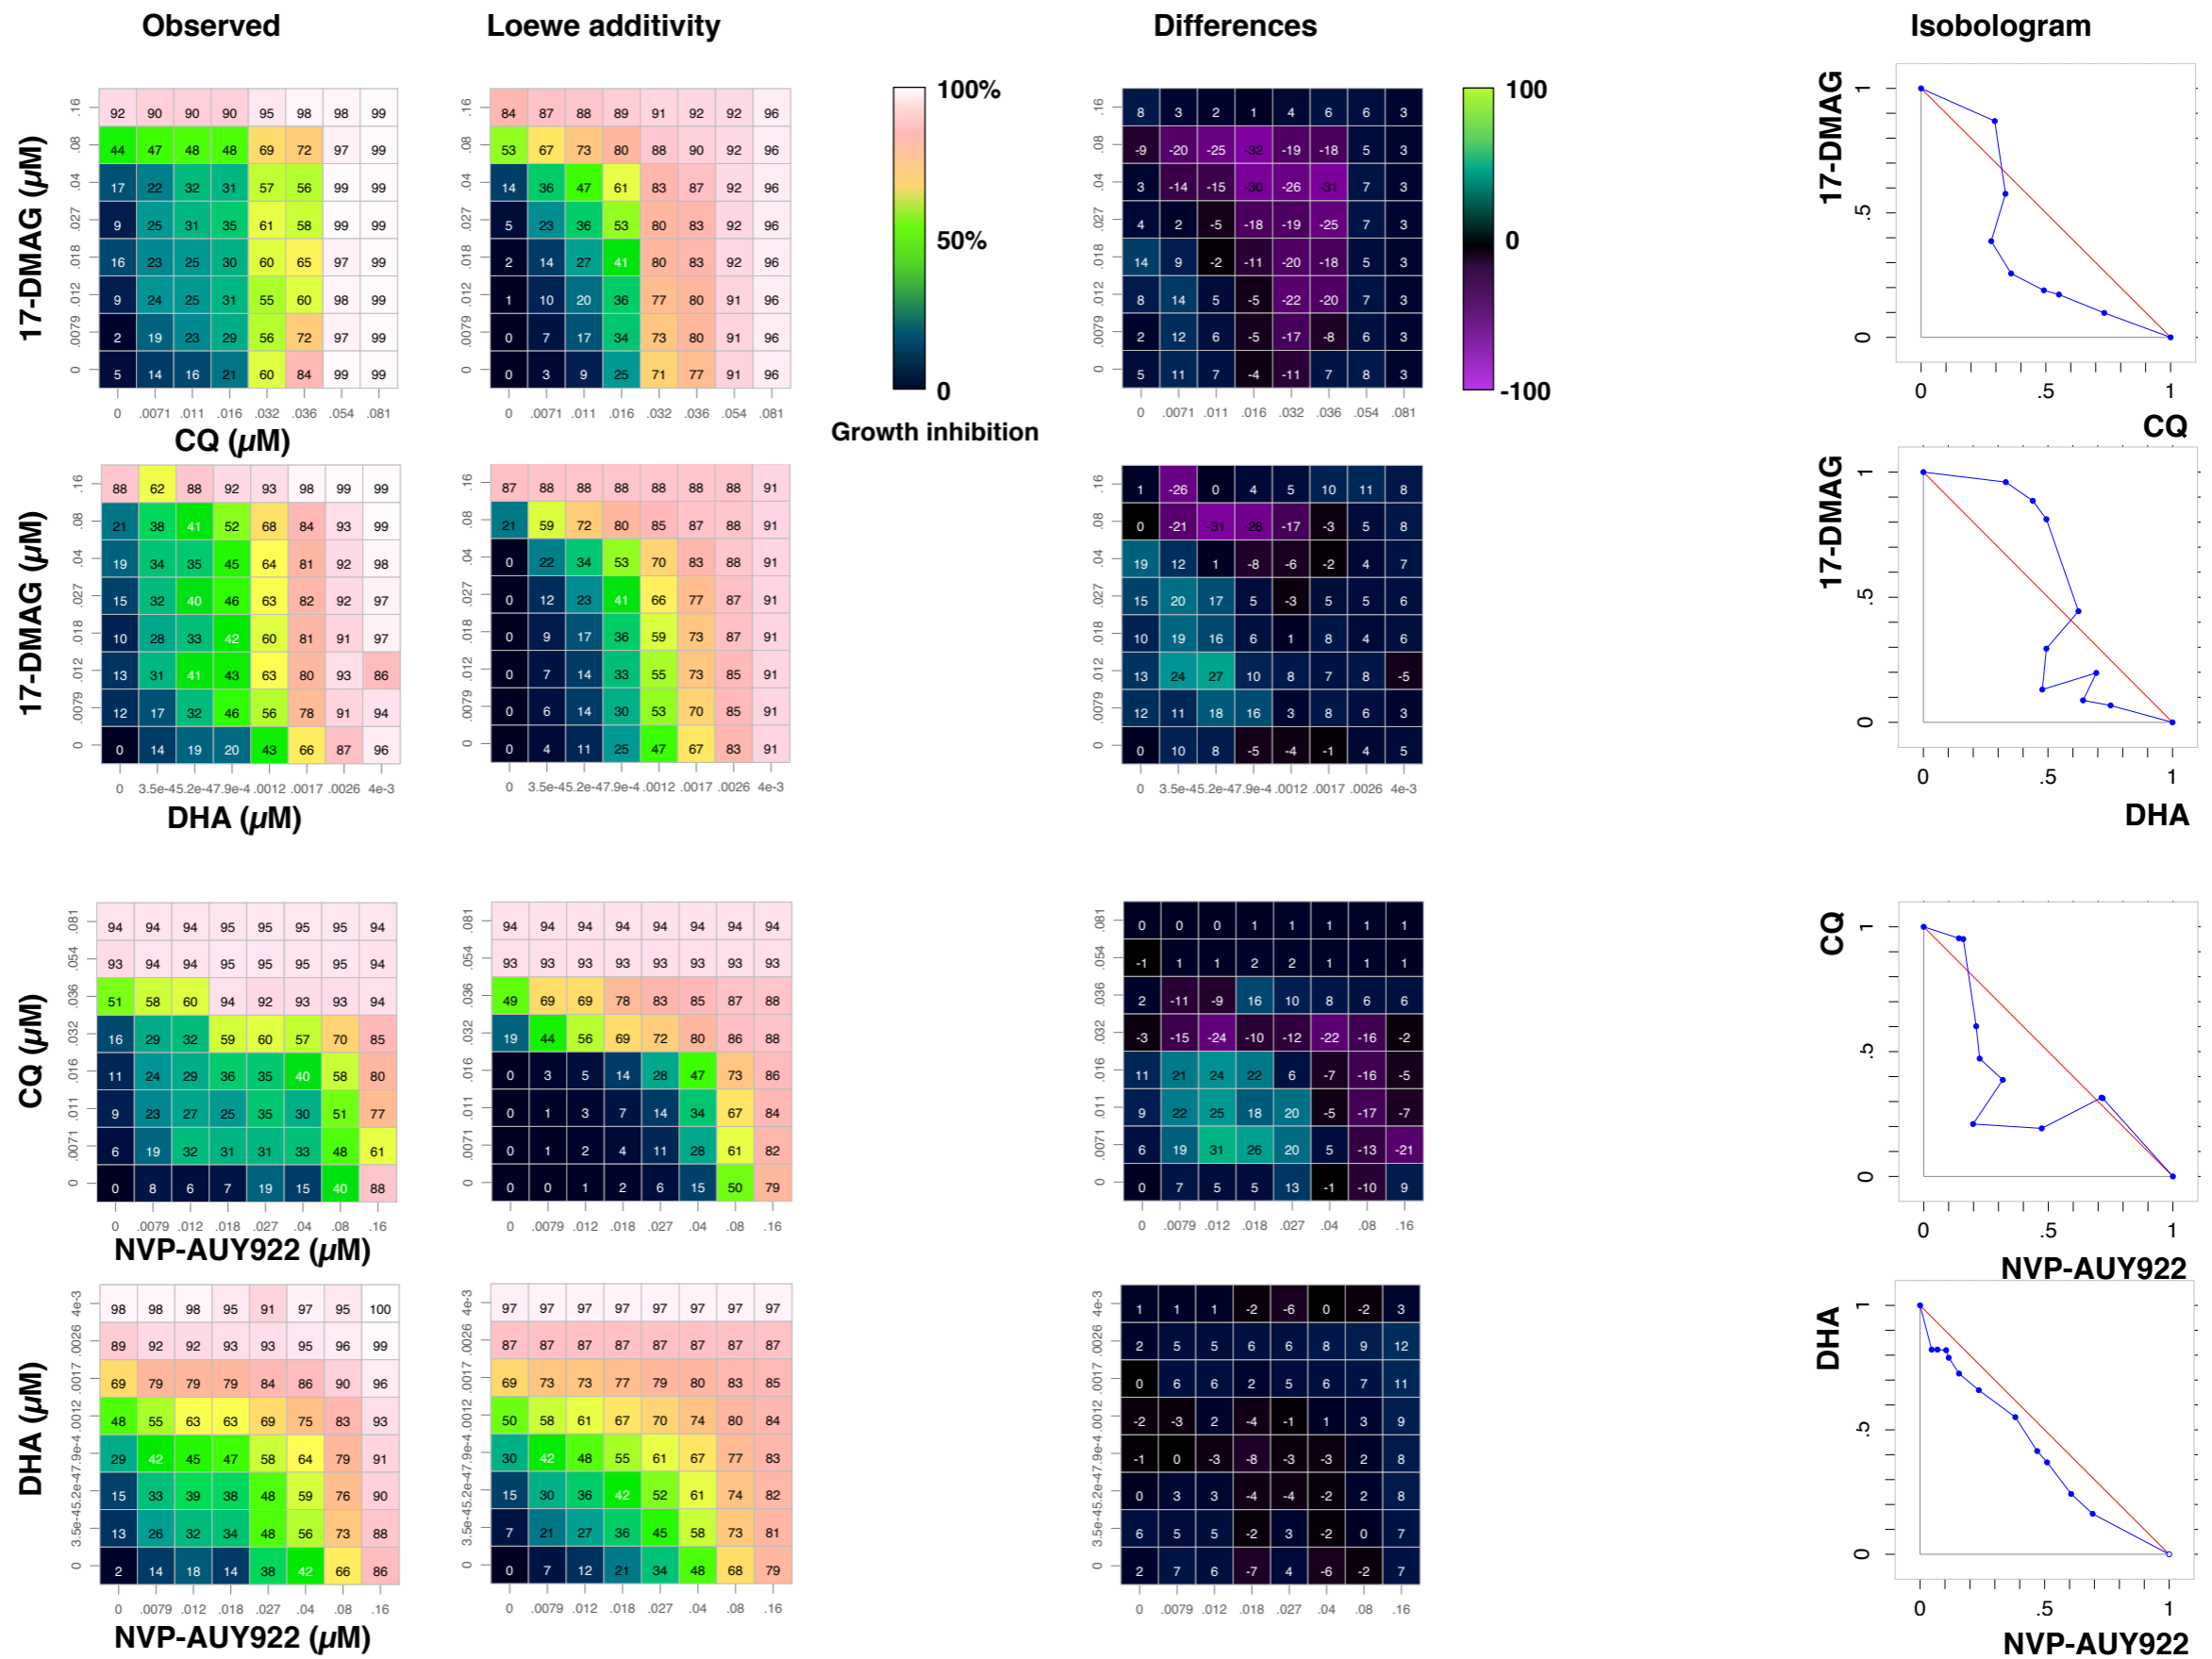

Figure S3. Hp90 and antimalarial drug combination assays for *P. falciparum* 3D7 strain. On the left the average of two growth inhibition experiments, the Loewe additivity expected values and the differences between the observed data and the model. On the right isobolograms obtained with the isobole line in red. The area below the red line represent synergistic interaction, above antagonistic and around it no-interaction (additive).

# Figure S4

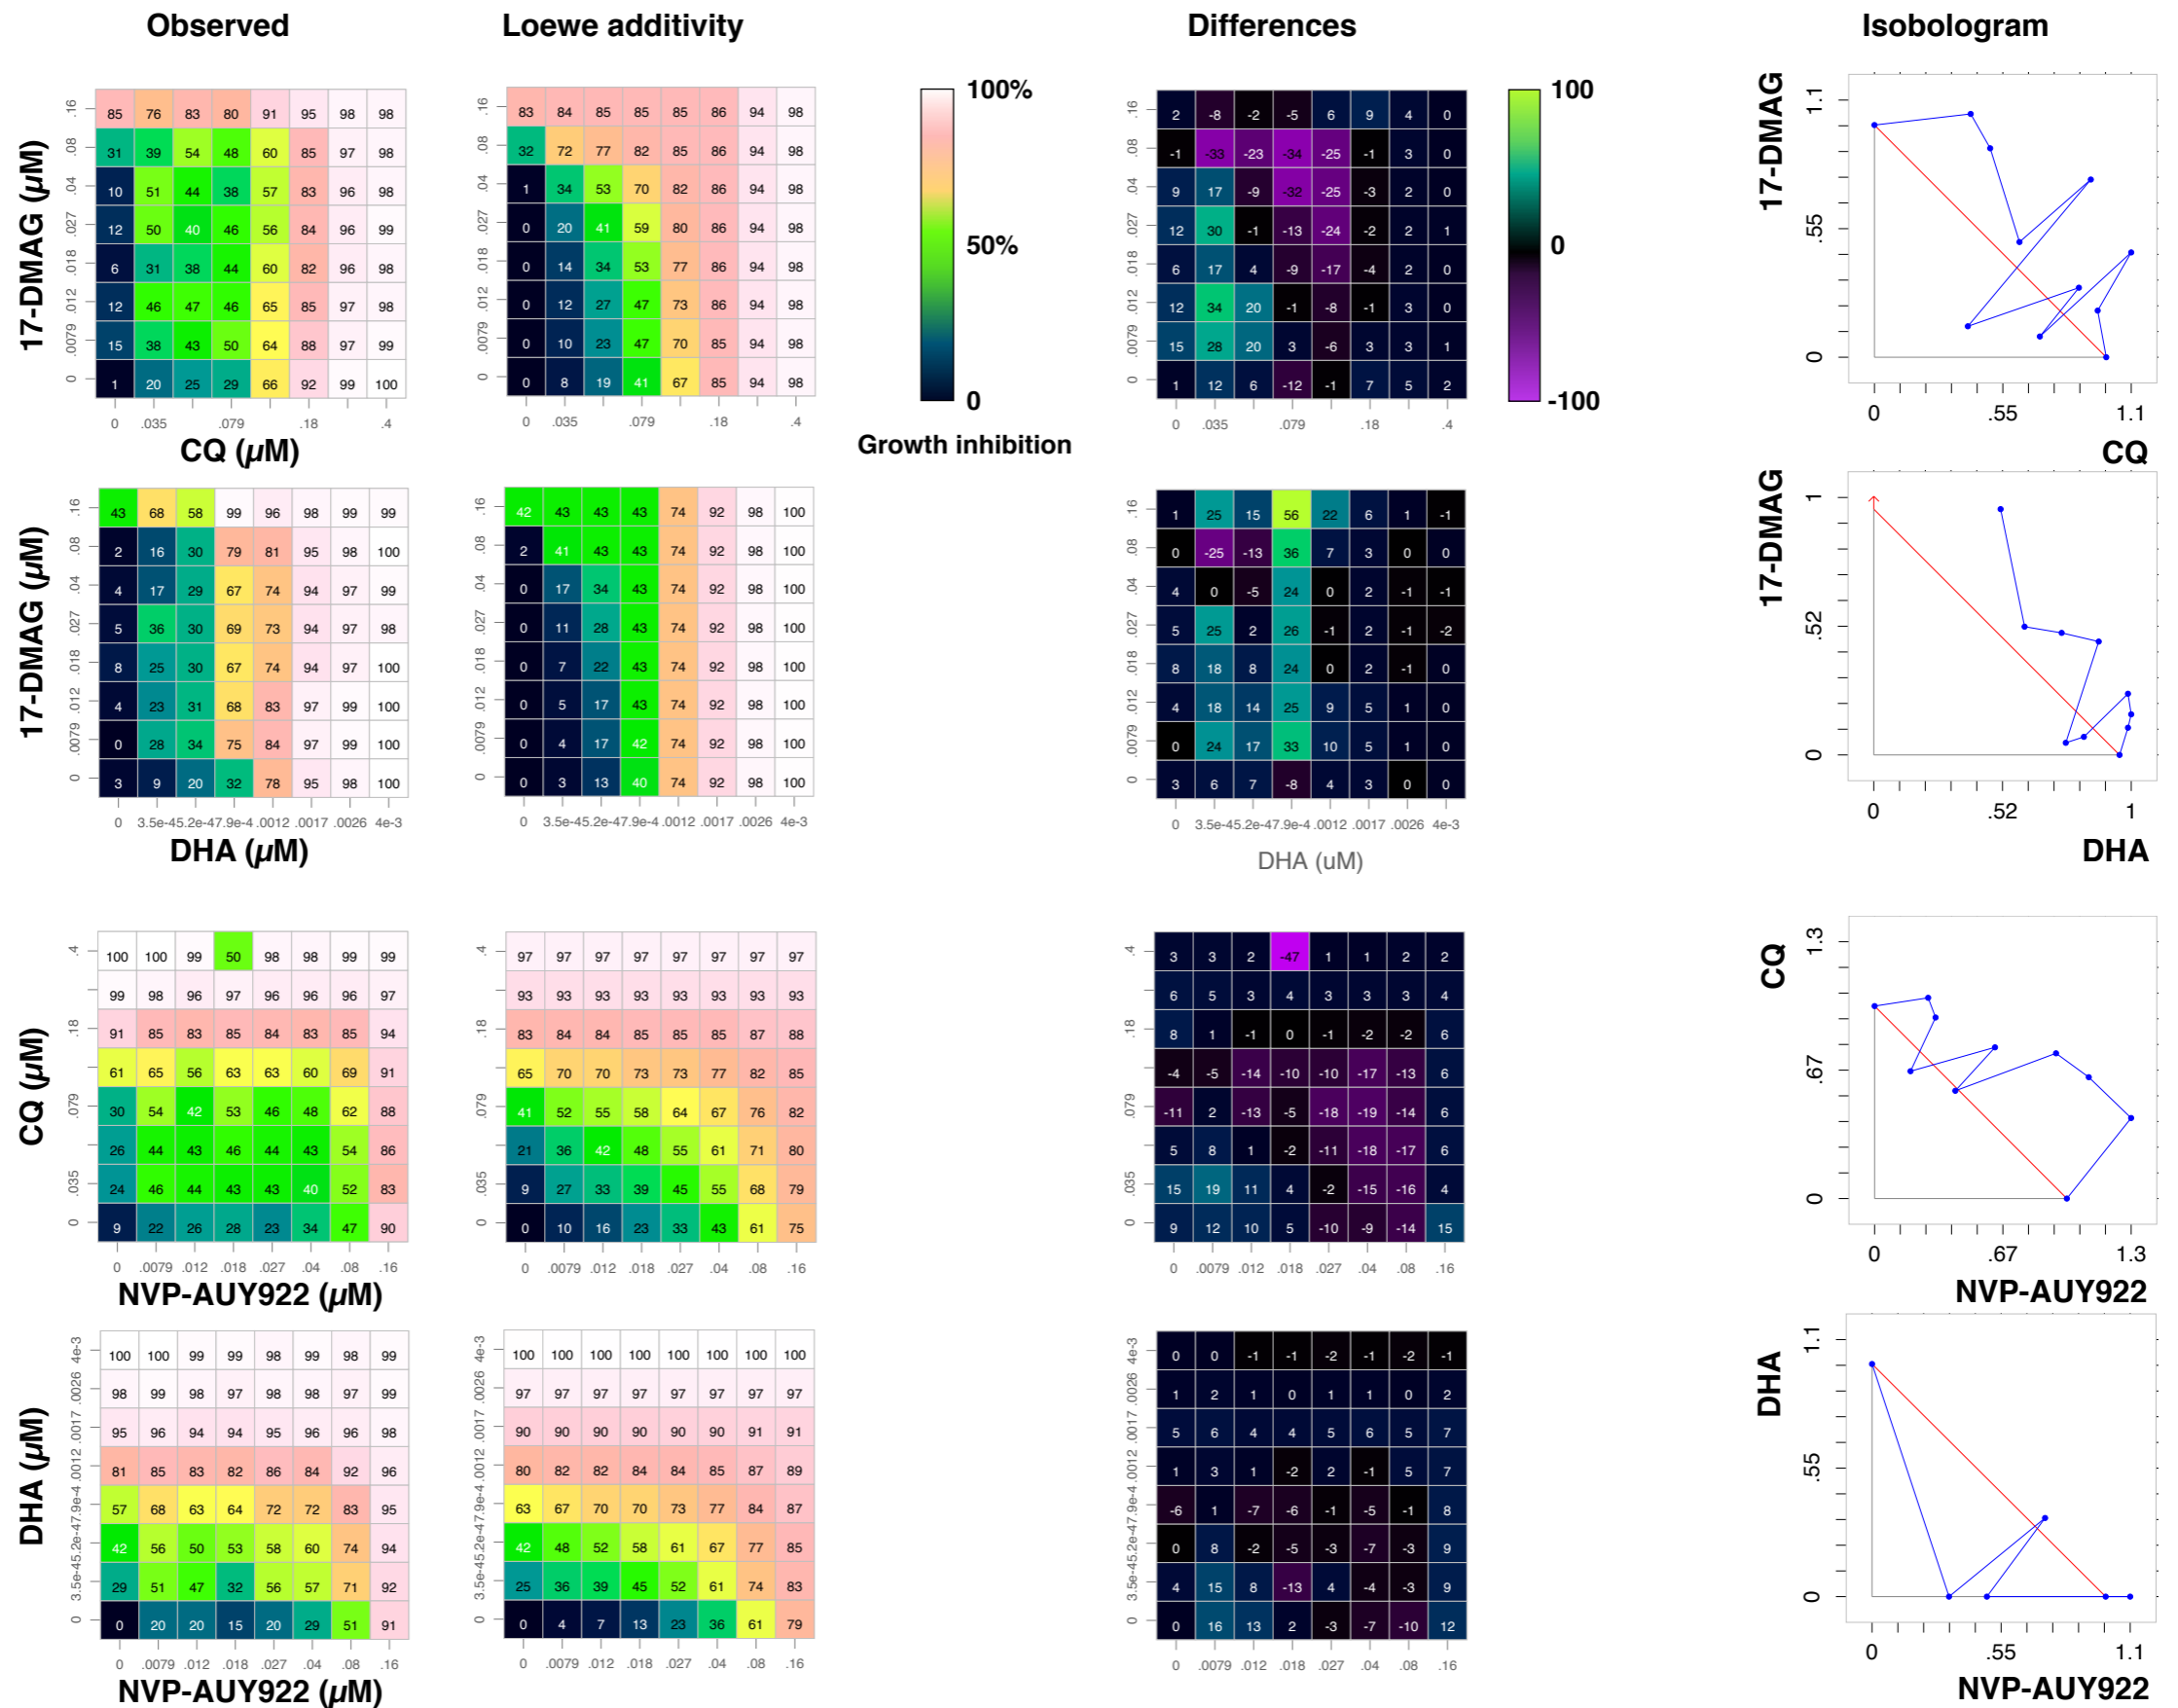

Figure S4. Hp90 and antimalarial drug combination assays for *P. falciparum* W2 strain. On the left the average of two growth inhibition experiments, the Loewe additivity expected values and the differences between the observed data and the model. On the right isobolograms obtained with the isobole line in red. The area below the red line represent synergistic interaction, above antagonistic and around it no-interaction (additive).

**Figure S5**

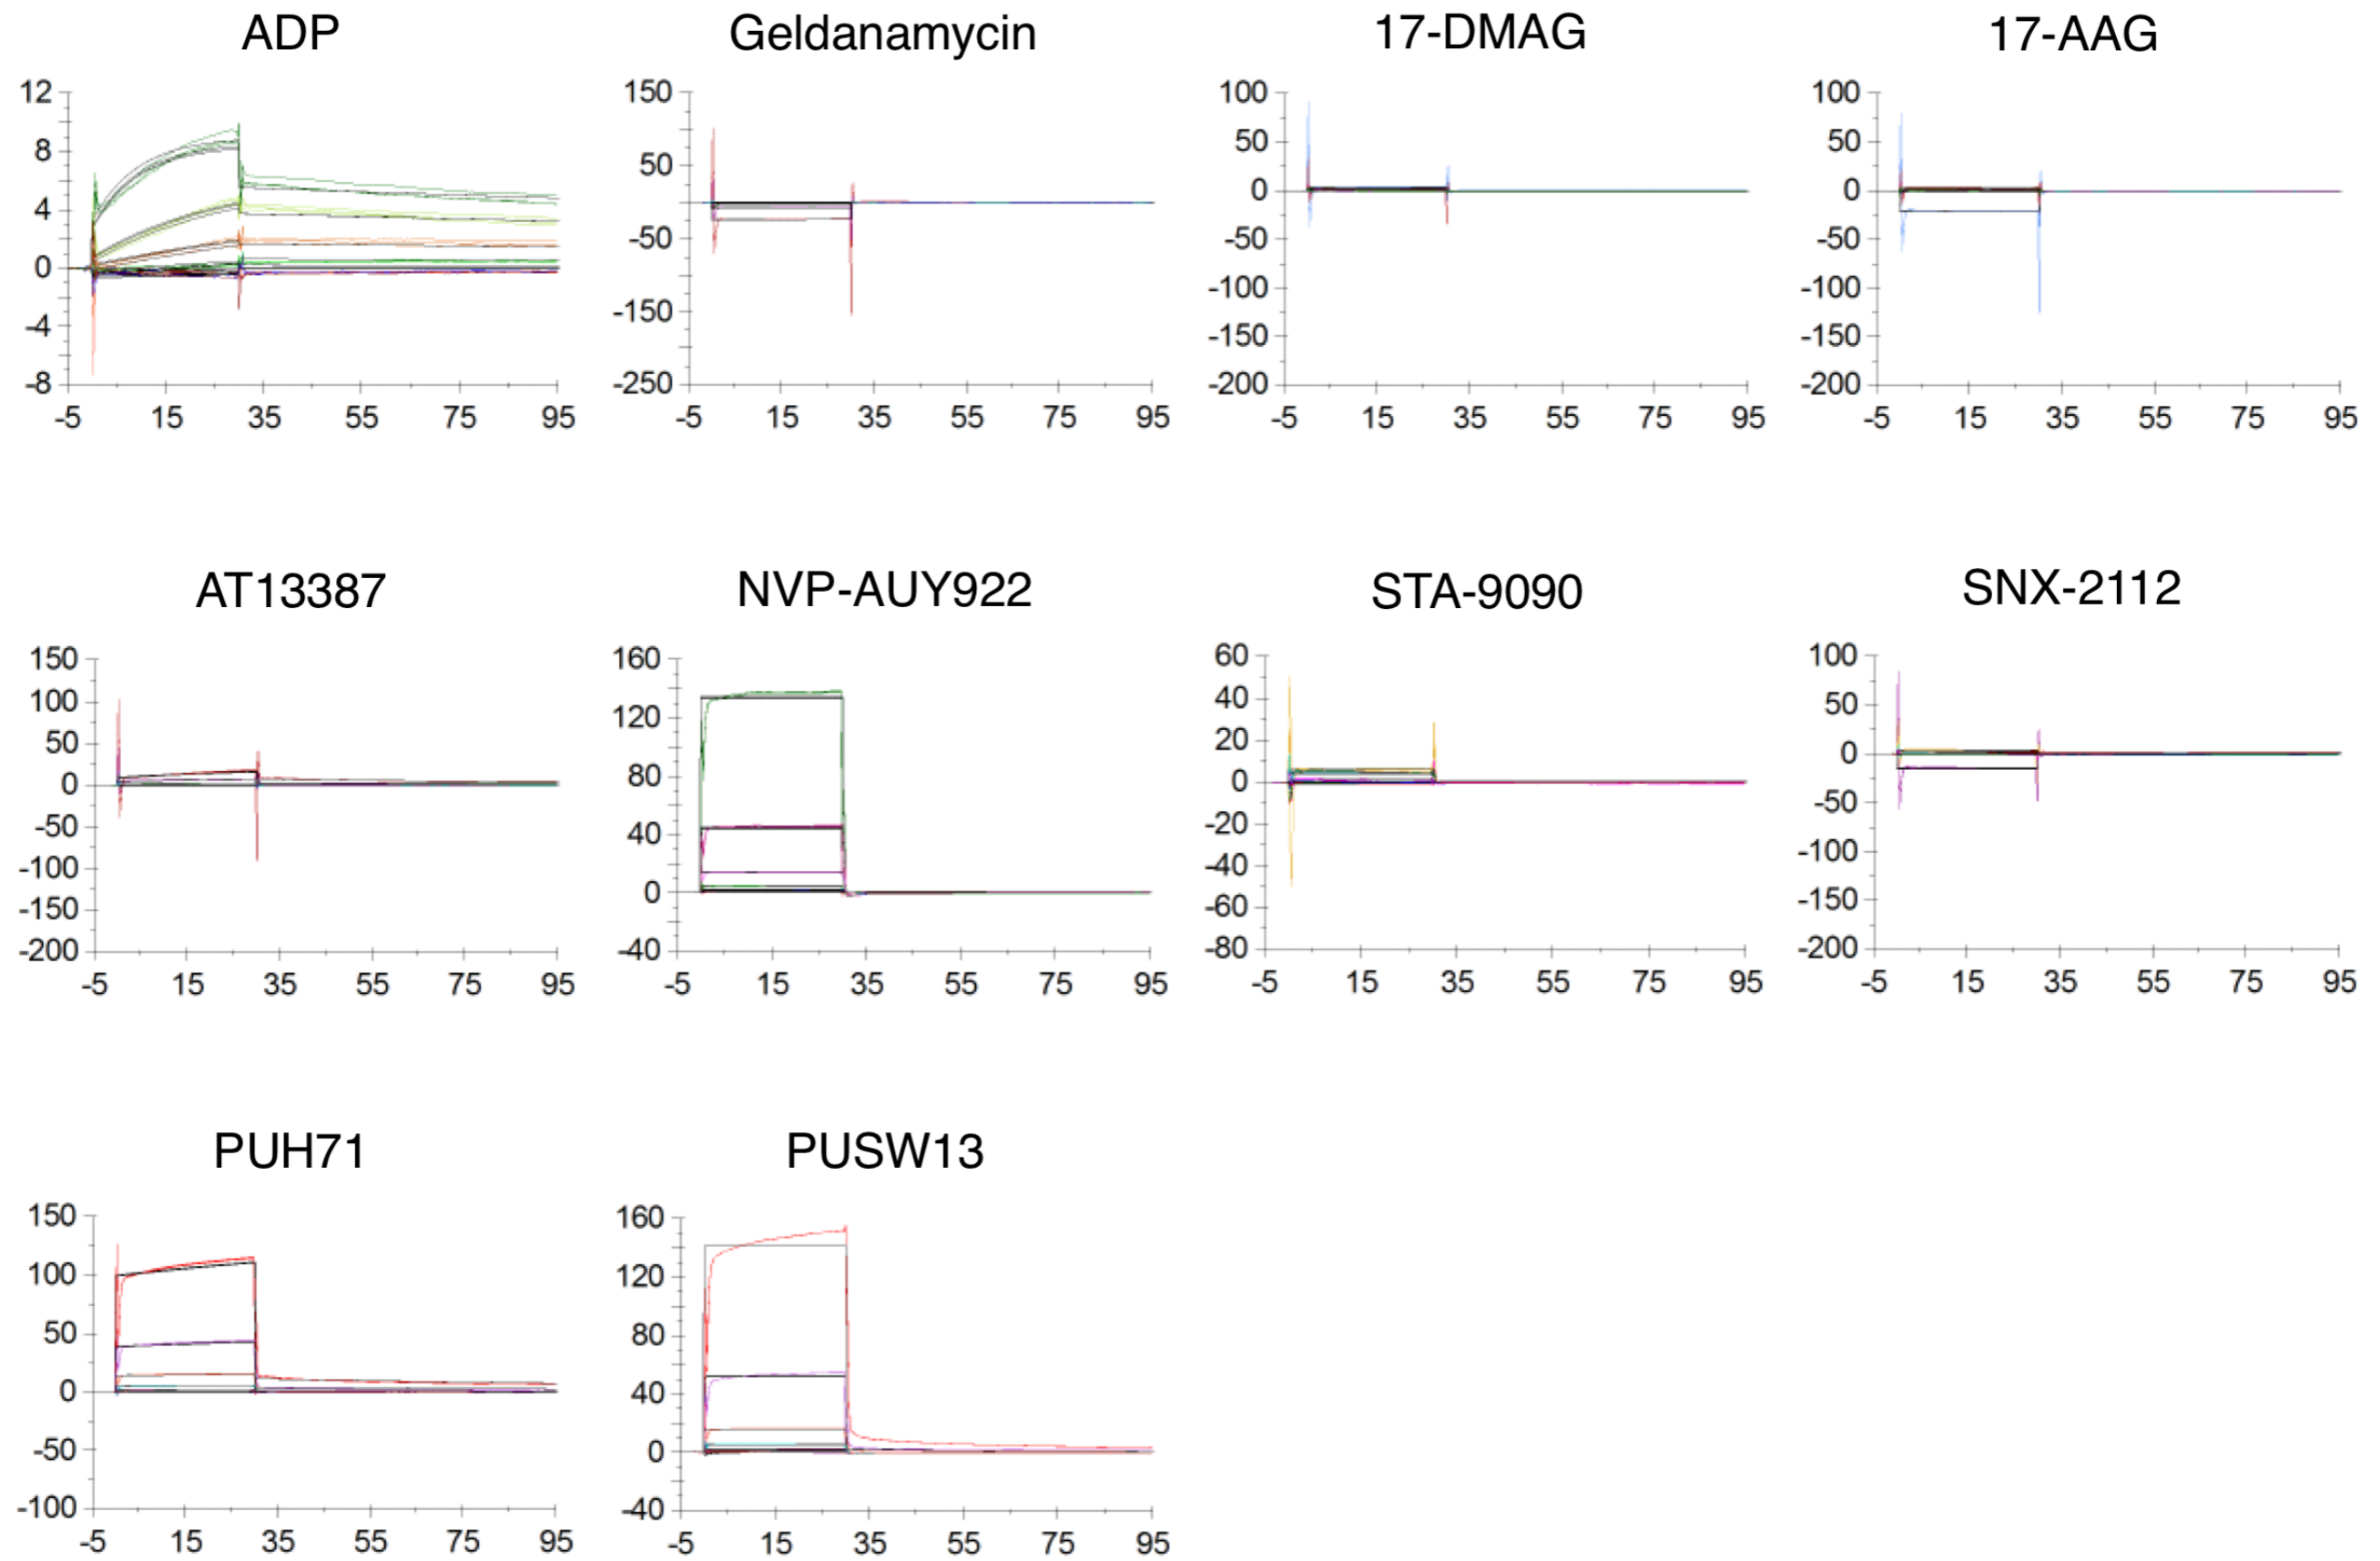

Figure S5. *P. falciparum* Hsp90 sensorgrams of the interaction between the parasite NTD against ADP and Hsp90 inhibitors.

**Figure S6**

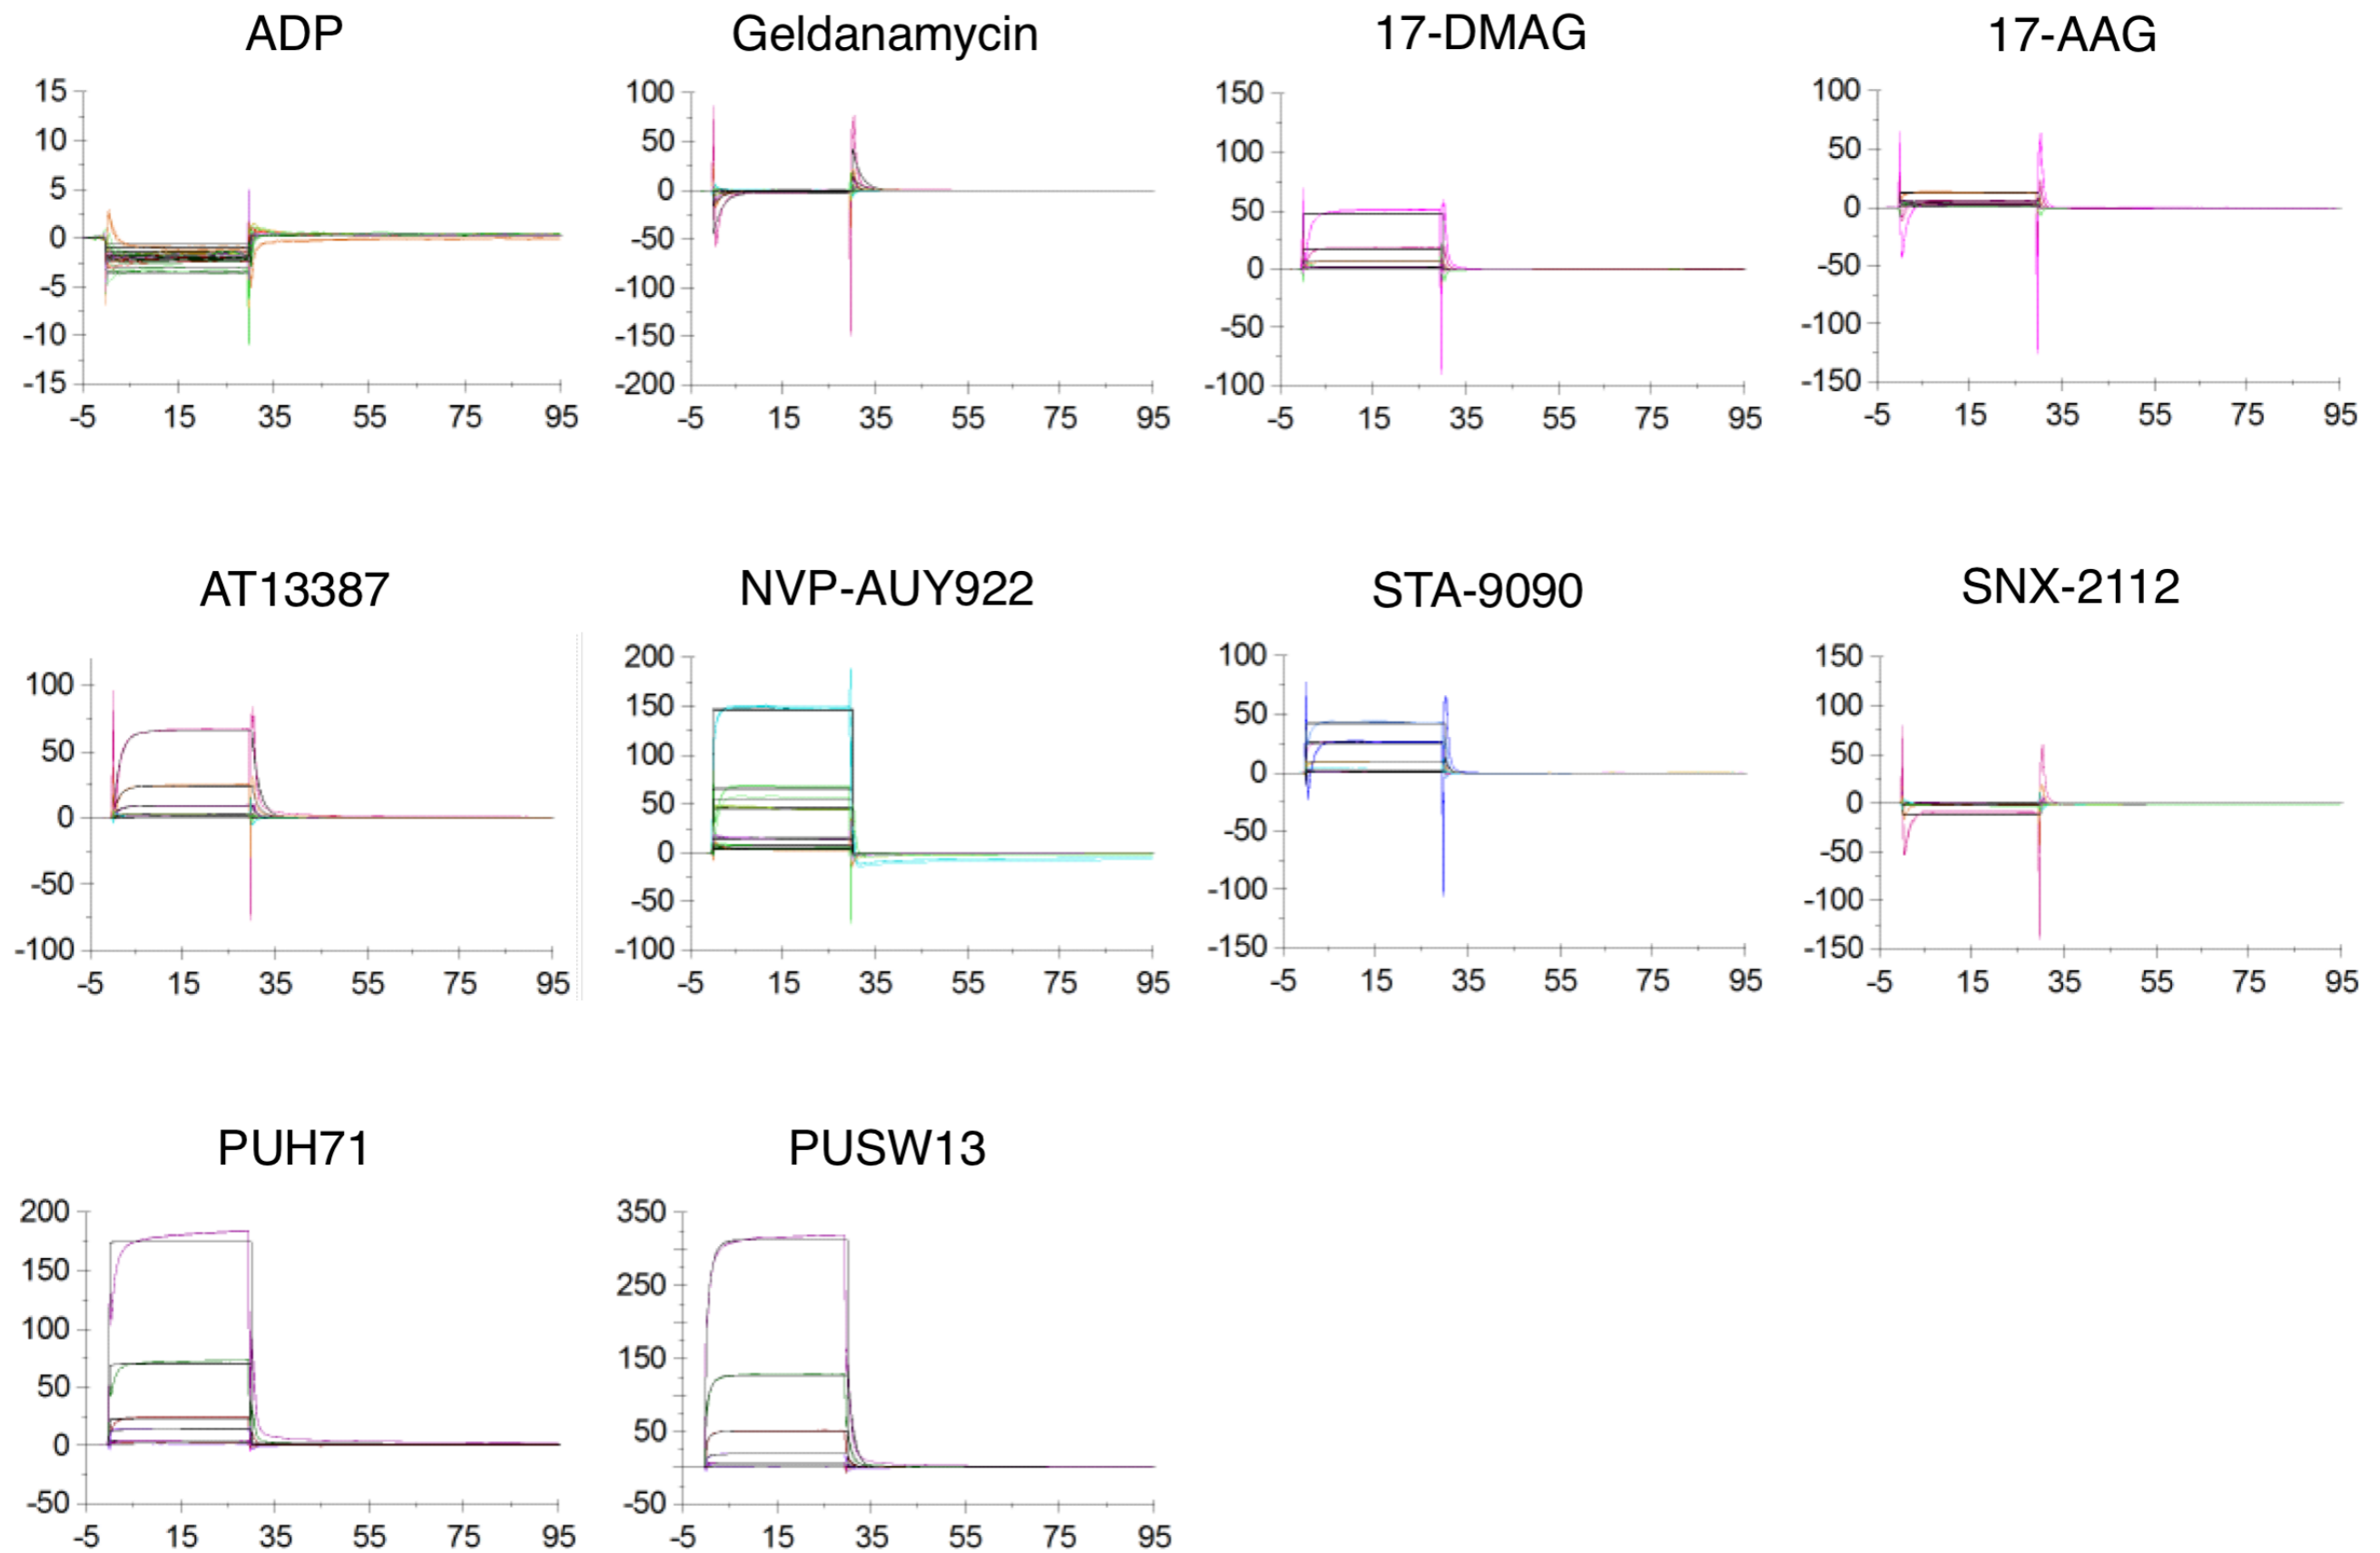

Figure S6. *P. falciparum* Grp94 sensorgrams of the interaction between the parasite NTD against ADP and Hsp90 inhibitors.



**Figure S7**

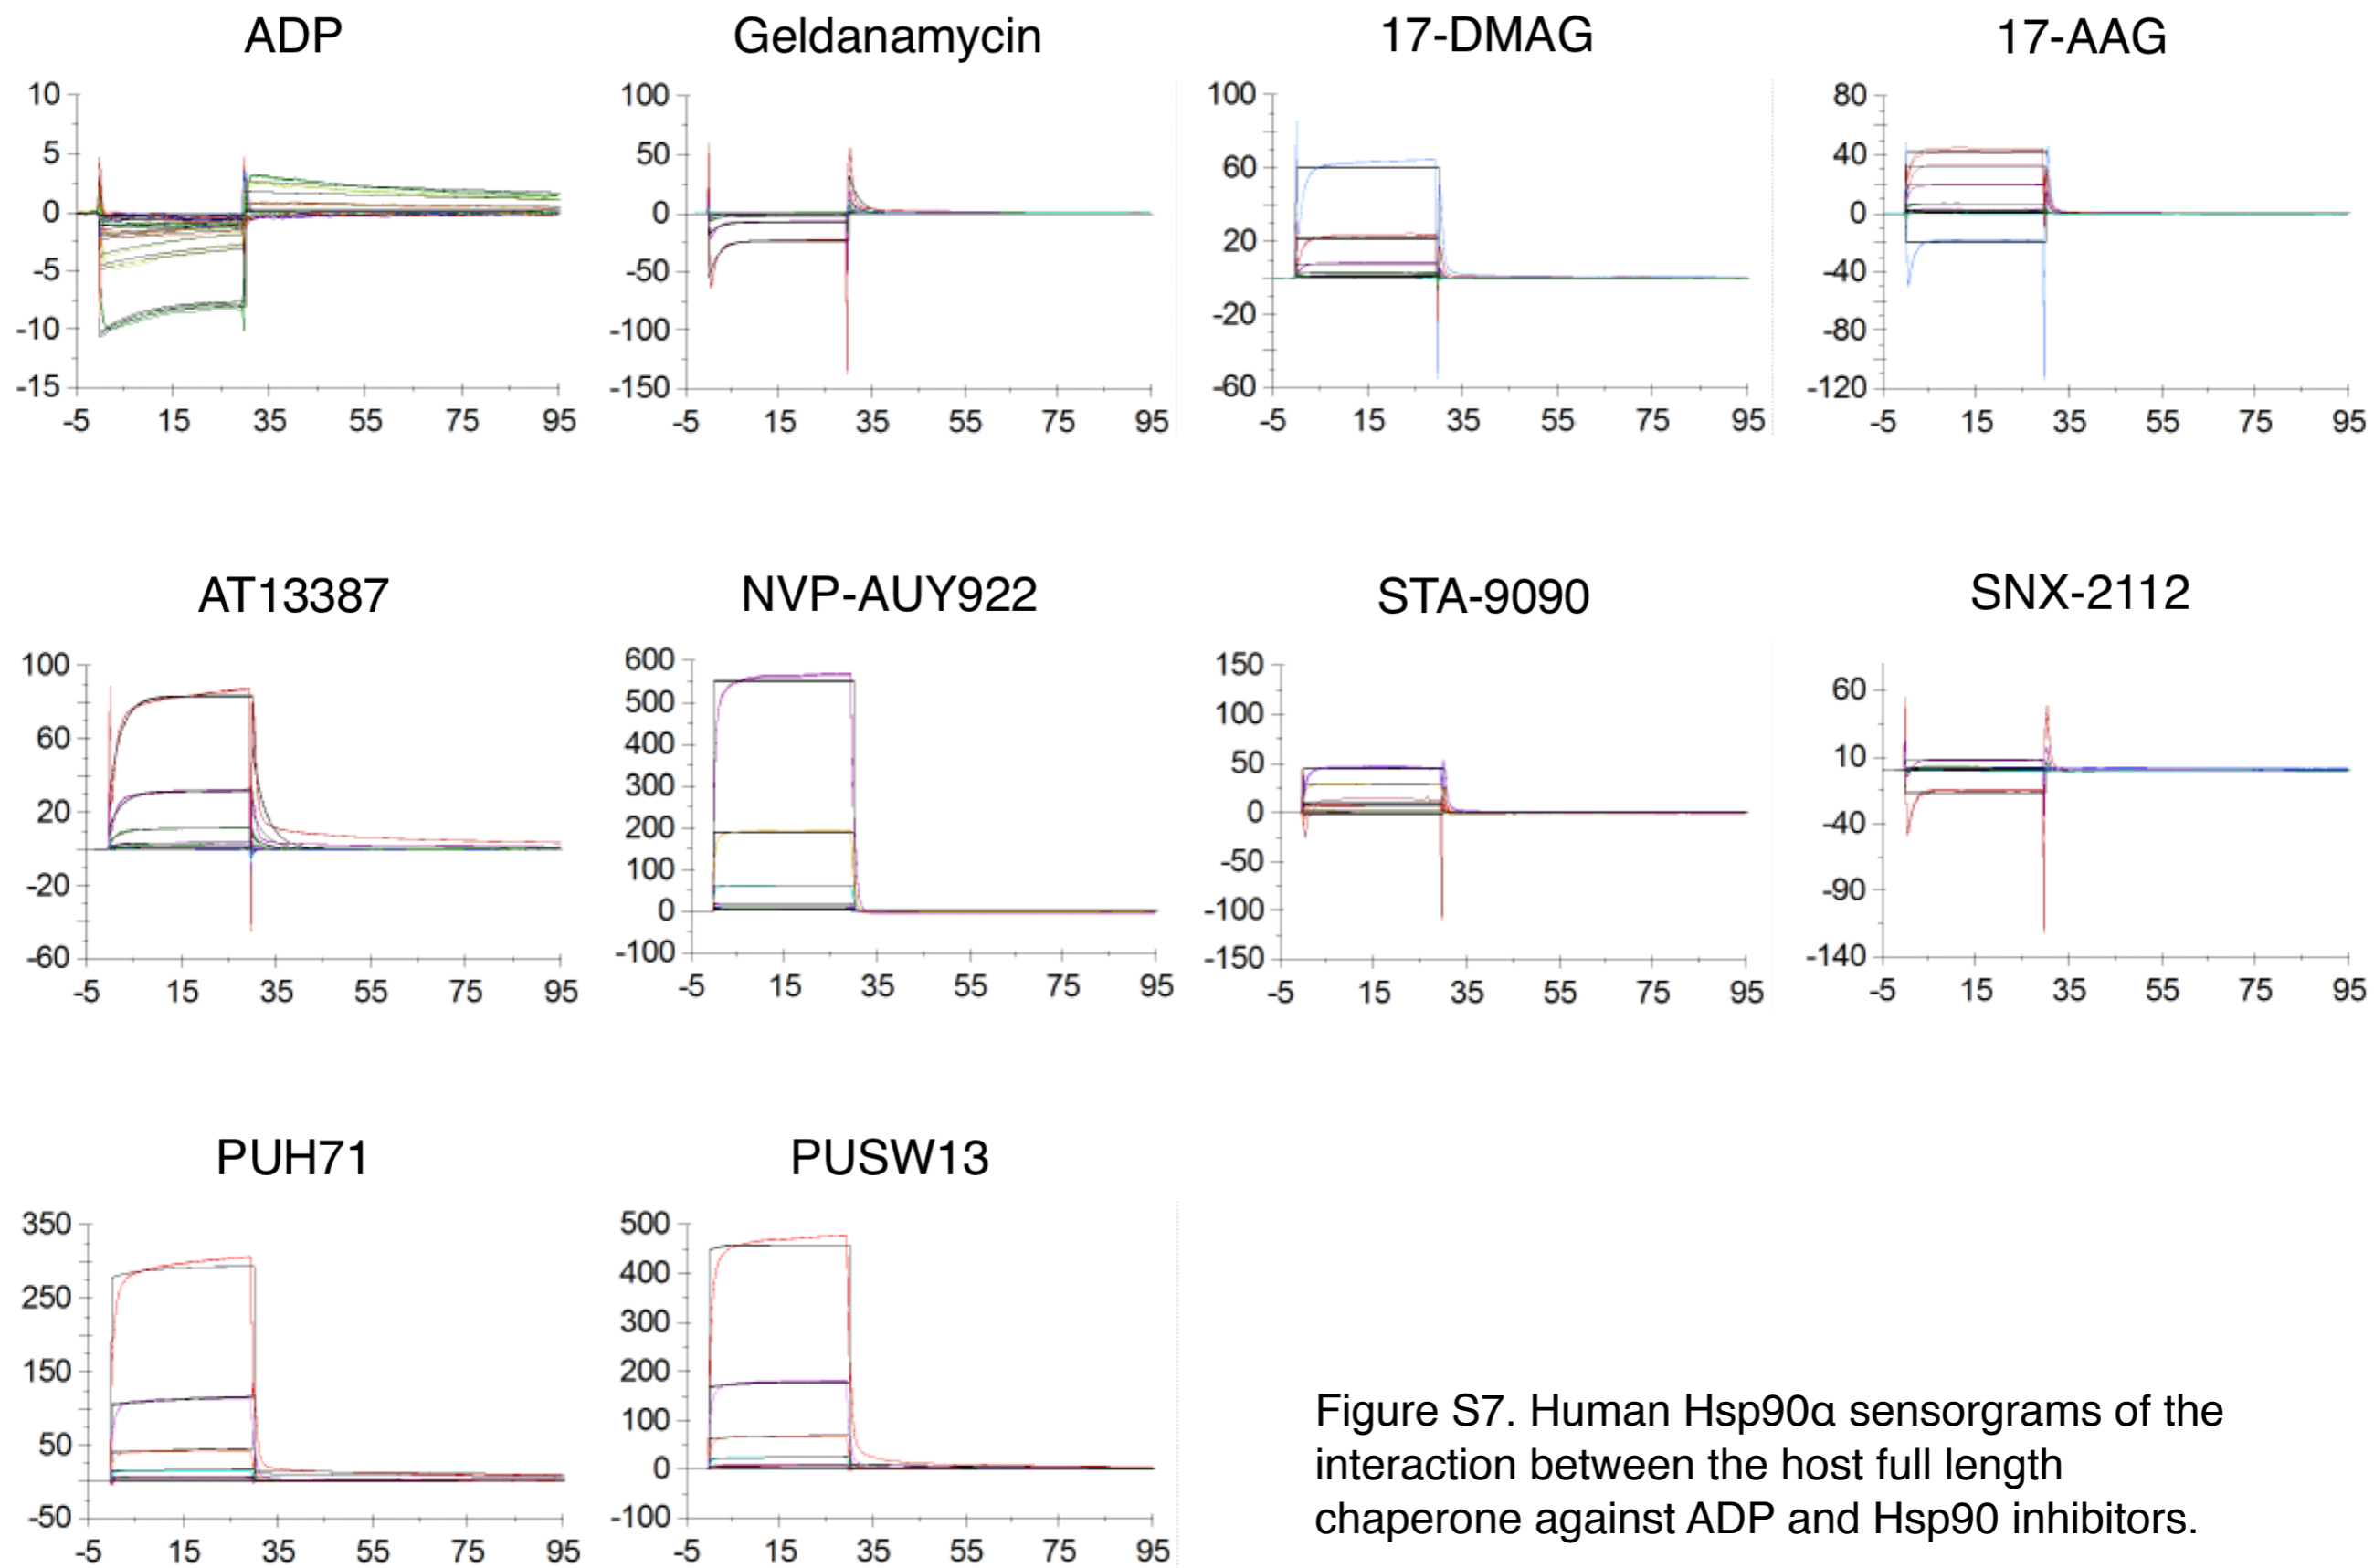

Figure S7. Human Hsp90 $\alpha$  sensorgrams of the interaction between the host full length chaperone against ADP and Hsp90 inhibitors.
